# Supplementary material
Source: PubMed Central journal article supplement (PMC3129449)
Supplement: NIHMS295941-supplement-Supp_Fig_S1.pdf [file NIHMS295941-supplement-Supp_Fig_S1.pdf]

Supplementary Information for Li et al.

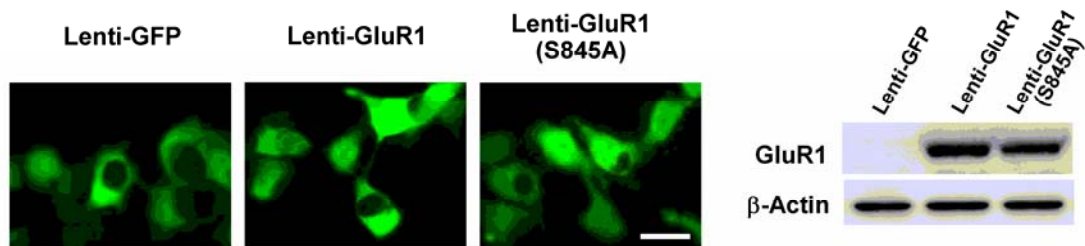

**Figure S1.** HEK cells were infected either with Lenti GFP, Lenti GluR1, or Lenti GluR1(S845A). Photomicrographs show the GFP positive cells produced in all cases. Immunoblots to the right show that GluR1 transgene expression was increased only in the Lenti GluR1 and Lenti GluR1(S845A) infected cells, confirming the viability of the Lentiviral vectors.
